# Supplementary material for: Novel phosphine oxide-based electron-transporting materials for efficient phosphorescent organic light-emitting diodes
Source: Royal Society of Chemistry journal article supplement (doi:10.1039/c7tc02828h), 2017-01-01
Supplement: c7tc02828h1.pdf [file c7tc02828h1.pdf]

## Supporting information

### Novel phosphine oxide-based electron-transporting materials for efficient phosphorescent organic light-emitting diodes

Zheng-Guang Wu,<sup>a</sup> Jie Zhou,<sup>a</sup> Lei Yu,<sup>a</sup> Georgios Karotsis,<sup>b</sup> Yi Wang,<sup>a,c,\*</sup> You-Xuan Zheng,<sup>a,c,\*</sup> Yi Pan<sup>a,c</sup>

<sup>a</sup> State Key Laboratory of Coordination Chemistry, Collaborative Innovation Center of Advanced Microstructures, School of Chemistry and Chemical Engineering, Nanjing University, Nanjing 210093, P. R. China, \*e-mail: yiwang@nju.edu.cn, yxzhang@nju.edu.cn

<sup>b</sup> School of Chemistry, Environmental & Life Sciences, University of The Bahamas, Nassau, 999154, The Bahamas

<sup>c</sup> MaAnShan High-Tech Research Institute of Nanjing University, MaAnShan, 238200, P. R. China

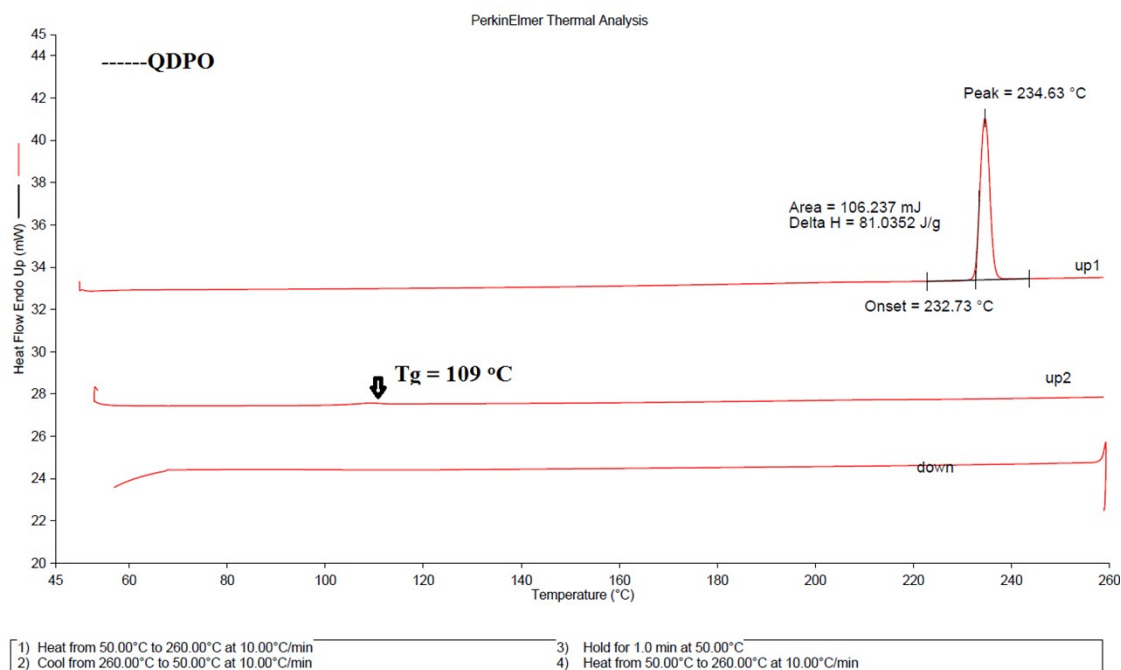

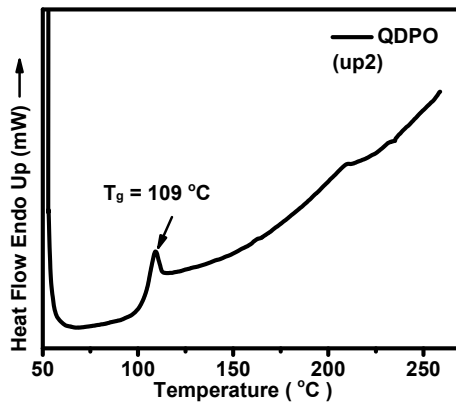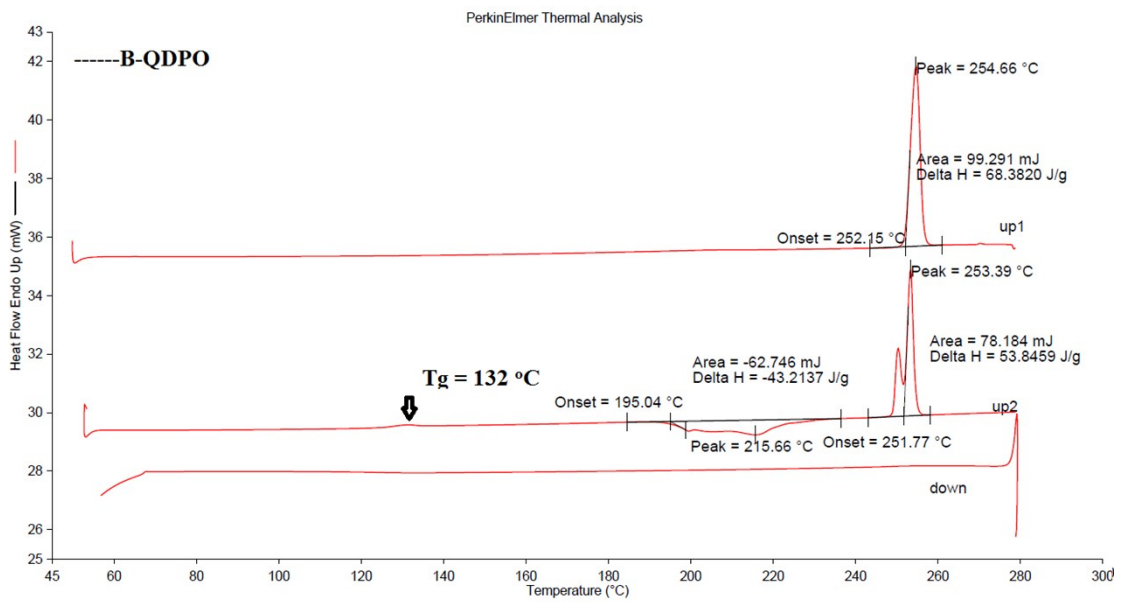

- |                                                                                                     |                                                                                                     |
|-----------------------------------------------------------------------------------------------------|-----------------------------------------------------------------------------------------------------|
| 1) Heat from 50.00 $^\circ\text{C}$ to 280.00 $^\circ\text{C}$ at 10.00 $^\circ\text{C}/\text{min}$ | 3) Hold for 1.0 min at 50.00 $^\circ\text{C}$                                                       |
| 2) Cool from 280.00 $^\circ\text{C}$ to 50.00 $^\circ\text{C}$ at 10.00 $^\circ\text{C}/\text{min}$ | 4) Heat from 50.00 $^\circ\text{C}$ to 280.00 $^\circ\text{C}$ at 10.00 $^\circ\text{C}/\text{min}$ |

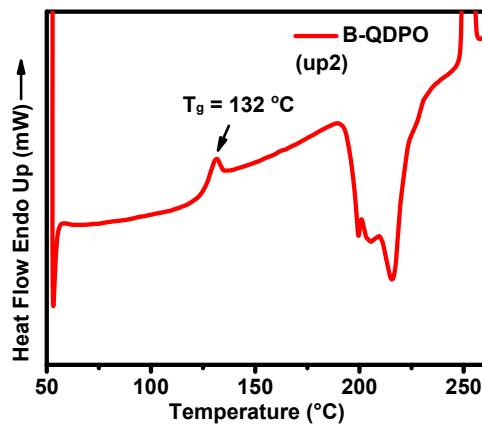

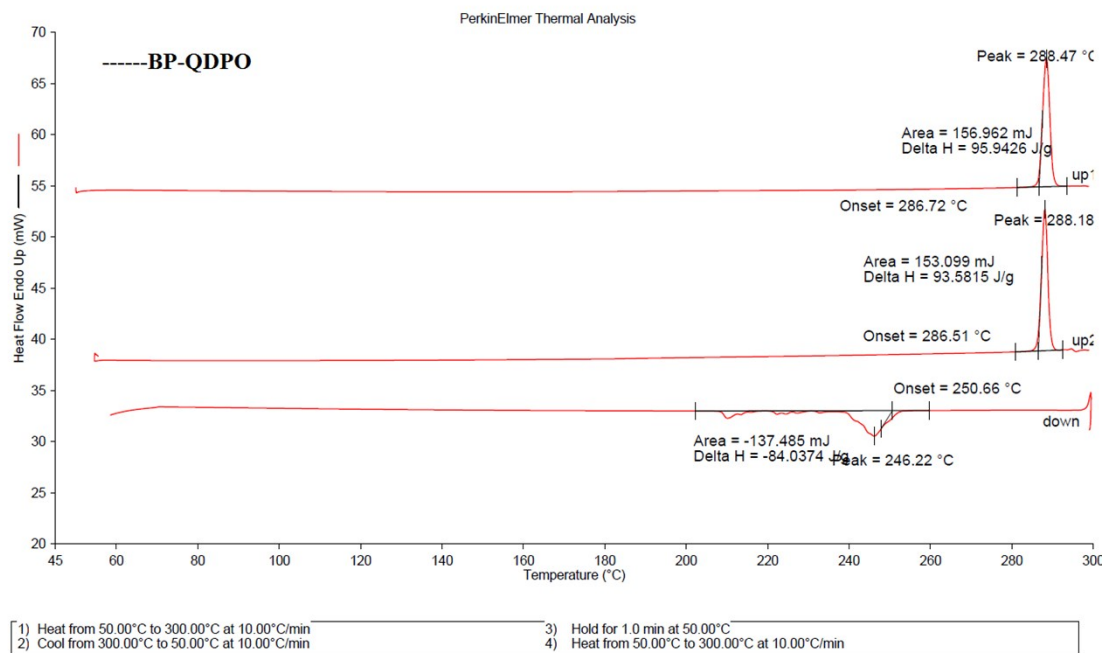

**Fig. S1** DSC traces of **QDPO**, **B-QDPO** and **BP-QDPO** recorded at a heating rate of  $10\text{ }^{\circ}\text{C min}^{-1}$ .

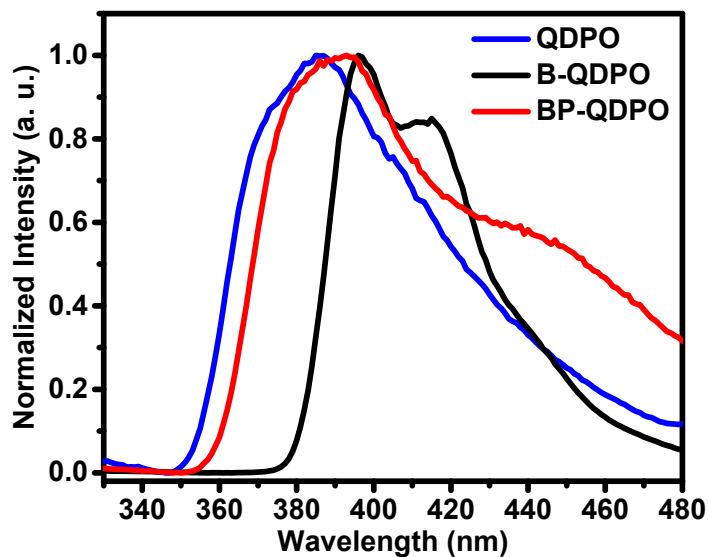

**Fig. S2** The low temperature phosphorescence spectra of **QDPO**, **B-QDPO** and **BP-QDPO** at 77 K in in  $\text{CH}_2\text{Cl}_2$  ( $10^{-5}\text{ M}$ ).

**Table S1.** The relevant data values for HOMO/LUMO levels of QDPO, B-QDPO and BP-QDPO.

| Compound       | $\Delta E_{\text{ox-Ferrocene}}$<br>[eV] | $\Delta E_{\text{ox-complexes}}$<br>[eV] | HOMO<br>[eV] | $\lambda_{\text{ab}}$<br>[nm] | $E_{\text{g}}$<br>[eV] | LUMO<br>[eV] |
|----------------|------------------------------------------|------------------------------------------|--------------|-------------------------------|------------------------|--------------|
| <b>QDPO</b>    | <b>0.17</b>                              | <b>1.73</b>                              | <b>-6.36</b> | <b>350</b>                    | <b>3.54</b>            | <b>-2.82</b> |
| <b>B-QDPO</b>  | <b>0.17</b>                              | <b>1.56</b>                              | <b>-6.19</b> | <b>379</b>                    | <b>3.27</b>            | <b>-2.92</b> |
| <b>BP-QDPO</b> | <b>0.17</b>                              | <b>1.48</b>                              | <b>-6.11</b> | <b>357</b>                    | <b>3.47</b>            | <b>-2.64</b> |
| TPBi           | 0.17                                     | 1.44                                     | -6.07        | 355                           | 3.49                   | -2.58        |

HOMO according to the peak of CV curves,  $E_{\text{HOMO}} = E_{\text{ox}} - E_{\text{Fc/Fc}^+}^+ + 4.8$ ;  $E_{\text{LUMO}} = E_{\text{HOMO}} - E_{\text{g}}$ ; initial absorption spectra of QDPO, B-QDPO, BP-QDPO for  $E_{\text{g}}$ .

### Example For QDPO:

$$E_{\text{HOMO}} = E_{\text{ox}} - E_{\text{Fc/Fc}^+}^+ + 4.8 = 1.73 - 0.17 + 4.8 = 6.36 \text{ eV};$$

$$E_{\text{g}} = 1240/350 = 3.54 \text{ eV};$$

$$E_{\text{LUMO}} = E_{\text{HOMO}} - E_{\text{g}} = 6.36 - 3.54 = 2.82 \text{ eV}.$$

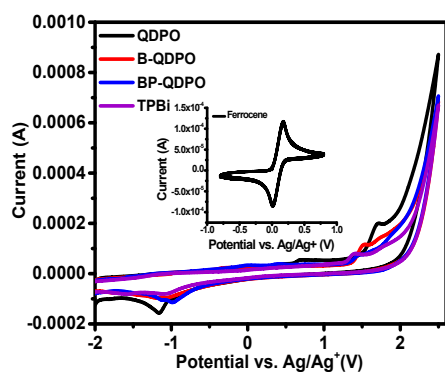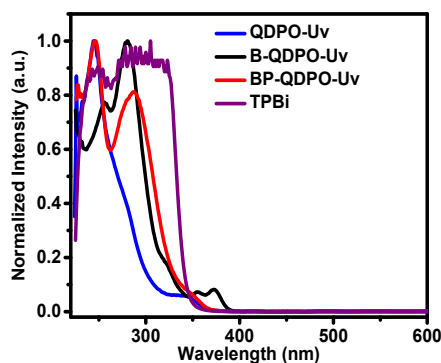

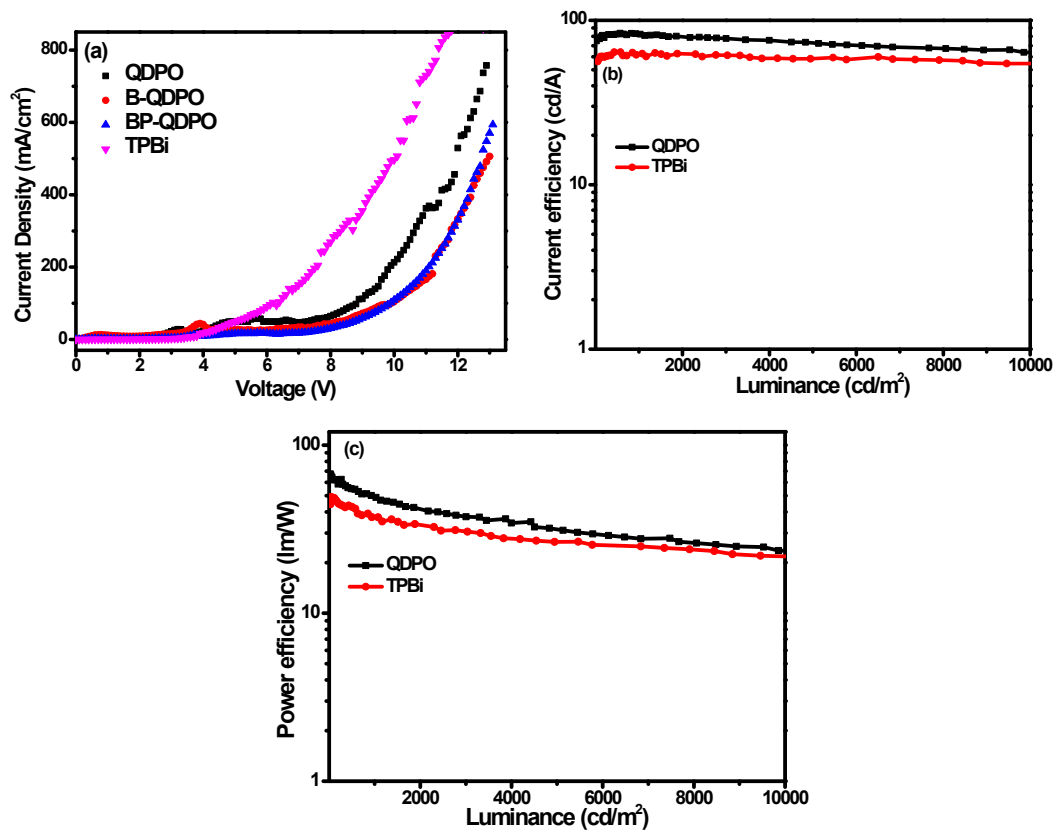

**Fig. S3** (a) Current density versus voltage characteristics of the electron-only devices with the configuration of ITO/ TmPyPB (1,3,5-tri(m-pyrid-3-yl-phenyl) benzene, 60 nm)/QDPO, B-QDPO, BP-QDPO or TPBi (30 nm) /LiF (1 nm)/Al (100 nm); (b) and (c) EL performances of devices based on QDPO and TPBi.

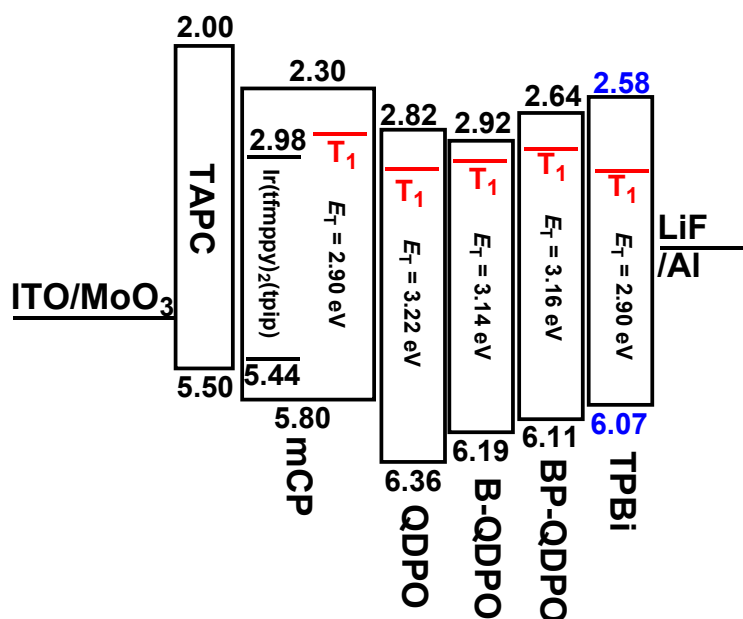

$$\begin{aligned}
 E_T \text{ for QDPO} &= 3.22 \text{ eV}, & T_1 &= -(6.36-3.22) = -3.14 \text{ eV} \\
 E_T \text{ for B-QDPO} &= 3.14 \text{ eV}, & T_1 &= -(6.19-3.14) = -3.05 \text{ eV} \\
 E_T \text{ for BP-QDPO} &= 3.16 \text{ eV}, & T_1 &= -(6.11-3.16) = -2.95 \text{ eV} \\
 E_T \text{ for TPBi} &= 2.90 \text{ eV}, & T_1 &= -(6.07-2.90) = -3.17 \text{ eV} \\
 E_T \text{ for mCP} &= 2.90 \text{ eV}, & T_1 &= -(5.80-2.90) = -2.90 \text{ eV}
 \end{aligned}$$

**Fig. S4** The chemical structures of the used materials as well as the energy level diagram of the device architecture.
